# Supplementary material
Source: PubMed Central journal article supplement (PMC2658060)

Supplementary Figure 1. Aldosterone oxidizes Cys-122 results to decrease GC NO--sensing in Cos-7 cells. **(A)** Cos-7 cells were exposed to aldosterone (ALDO)( $10^{-7}$  mol/L) or vehicle control for 24 h and protein expression of the mineralocorticoid receptor and NADPH oxidase protein subunits was determined by Western immunoblotting (n=3). **(B)** The effect of ALDO on reactive oxygen species (ROS) accumulation was measured by 6-carboxy-2',7' dichlorodihydrofluorescein diacetate ester (DCF) fluorescence (n=3), and **(C)** H<sub>2</sub>O<sub>2</sub> generation was evaluated by Amplex Red fluorescence assay (n=3). \*p<0.02 vs. V. **(D)** COS-7 cells were transiently transfected with GC wild-type (WT)  $\alpha_1$ - and either  $\beta_1$ -subunit DNA or a mutated  $\beta_1$ -subunit DNA with a cysteine to alanine substitution at position 122 ( $\beta_1$ -C122A) **(A)** COS-7 cells expressing WT ( $\alpha_1$  and  $\beta_1$  subunits) or  $\alpha_1/\beta_1$ -C122A were stimulated with sodium nitroprusside (1mM) for 10 min, and exposed to either vehicle control (V) or aldosterone (ALDO)( $10^{-7}$  mol/L) for 24 h and cGMP levels were measured (n=3). MR, mineralocorticoid receptor; GC, guanylyl cyclase. NS, not statistically significant vs. V. \*p<0.05 vs. V. Data are presented as mean  $\pm$  SEM. Representative blots are shown. Data are presented as mean  $\pm$  SEM.

Supplemental Figure 1

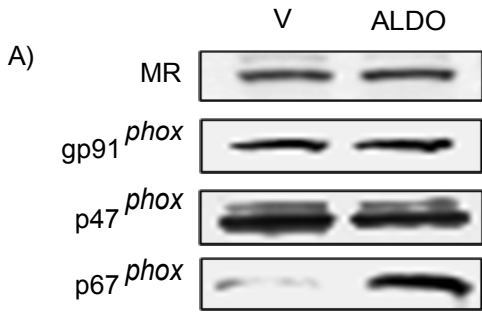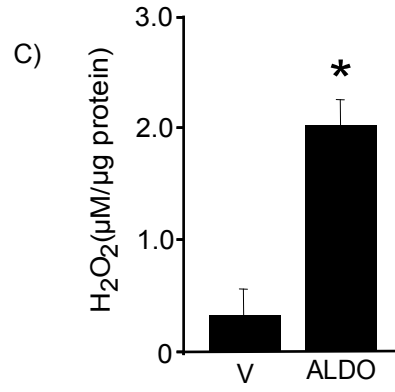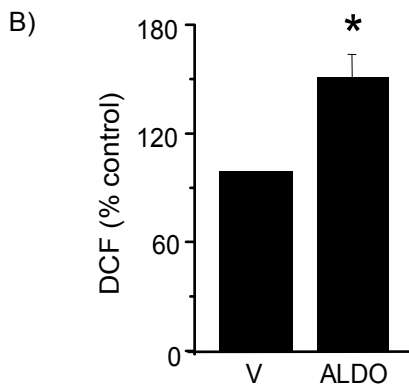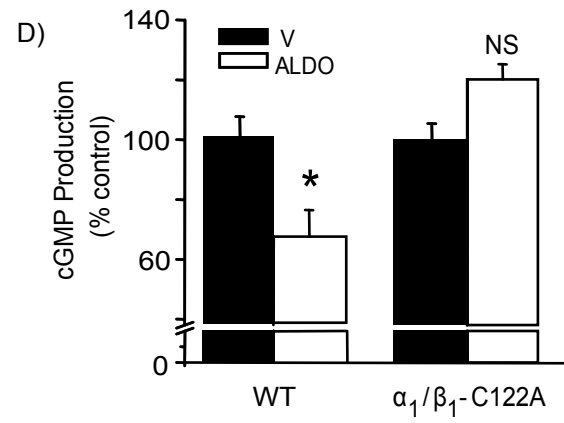

Supplement: M809460200_1.pdf [file M809460200_1.pdf]
